# Supplementary material for: Large intrinsic anomalous Hall effect in half-metallic ferromagnet Co3Sn2S2 with magnetic Weyl fermions
Source: PubMed Central journal article supplement (PMC6134149; doi:10.1038/s41467-018-06088-2), 2018-09-11
Supplement: 41467_2018_6088_MOESM1_ESM.pdf [file 41467_2018_6088_MOESM1_ESM.pdf]

## Supplementary Figures

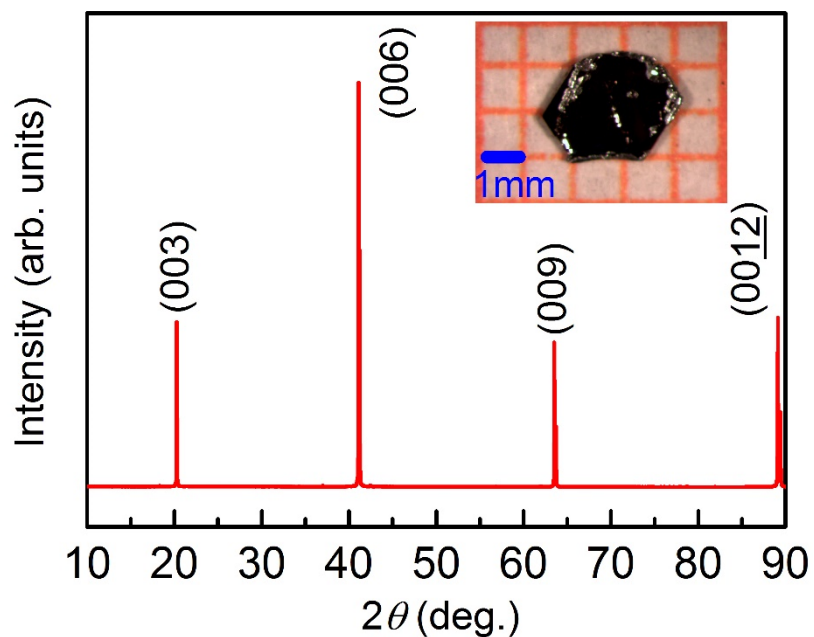

**Supplementary Figure 1.** XRD pattern of a  $\text{Co}_3\text{Sn}_2\text{S}_2$  single crystal. All of peaks can be indexed by the indices of (00 $l$ ) lattice planes. It reveals that the crystal surface is normal to the  $c$ -axis with the plate-shaped surface parallel to the  $ab$  plane. Inset: photo of typical  $\text{Co}_3\text{Sn}_2\text{S}_2$  single crystals on a 1 mm grid paper.

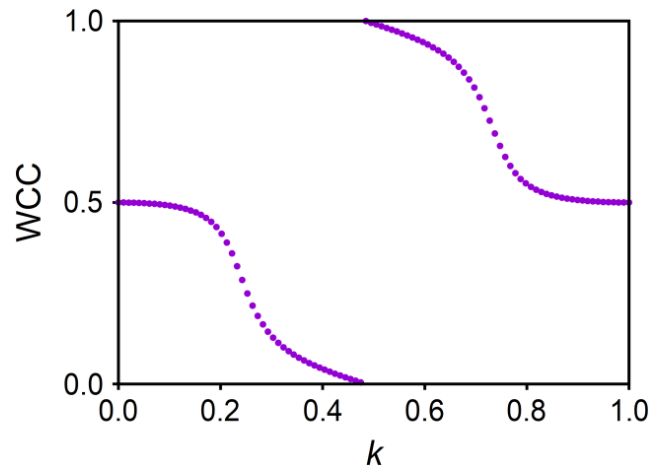

**Supplementary Figure 2.** The evolution of Wannier charge center (WCC) on a sphere that enclosing a WP in Brillouin Zone.

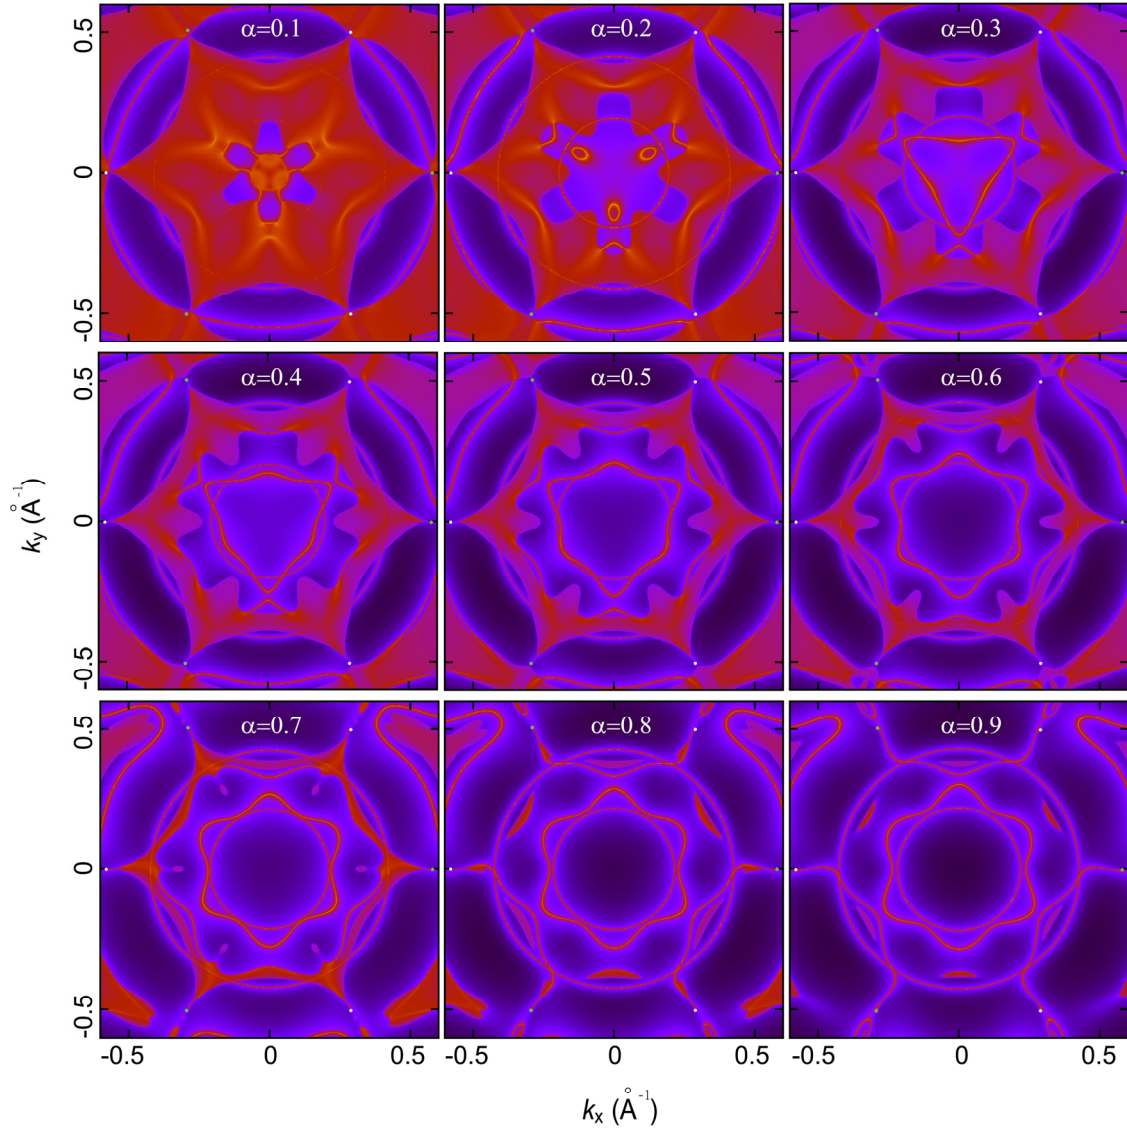

**Supplementary Figure 3.** Calculated (001) surface states of  $\text{Co}_3\text{Sn}_2\text{S}_2$  cutting on the energy of WPs with the redefined Fermi energy  $E_F(k) = \alpha[E_N(k) + E_{N+1}(k)]/2$ .

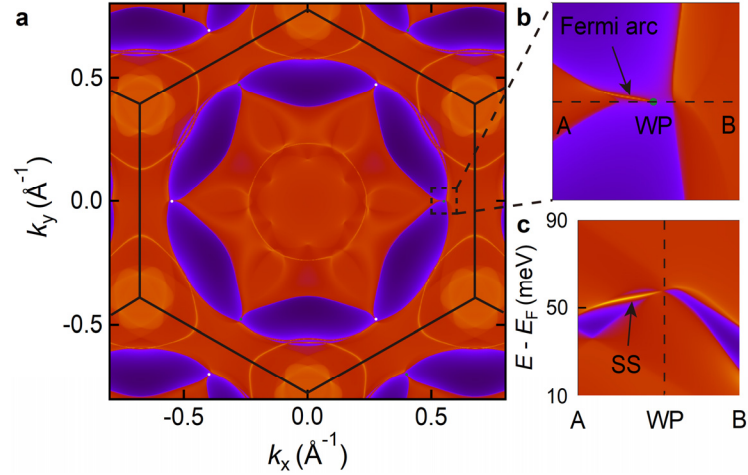

**Supplementary Figure 4.** Calculated (001) surface states of the  $\text{Co}_3\text{Sn}_2\text{S}_2$  without structural relaxation. (a,b) Fermi surface calculation on the (001) surface cutting on the energy of WPs. The white and green dots represent the projected WPs with positive and negative chirality respectively. (c) The spectrum distribution near the WP along AB direction in b.

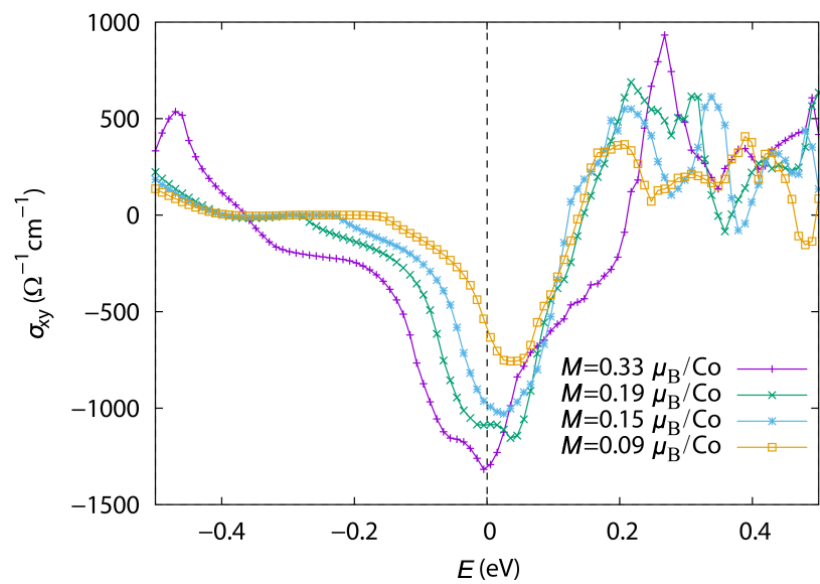

**Supplementary Figure 5.** Energy dependence of the intrinsic anomalous Hall conductivity with various magnetic moments of Co. The  $E_F$  is set to 0.

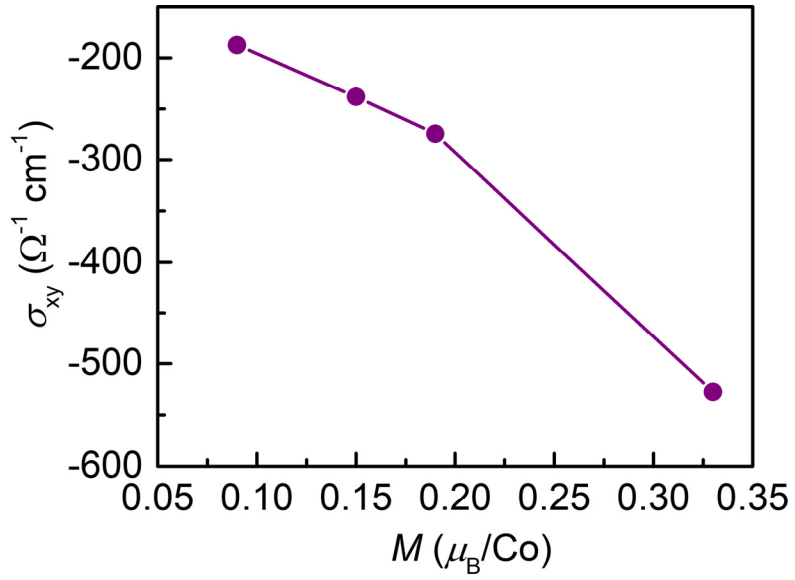

**Supplementary Figure 6.** The intrinsic AHC versus magnetization strength calculated by the formula of  $\sigma_{xy} = K\ell^2/4\pi^2$ , where  $K$  is the distance along (001) direction between the Weyl points with opposite chirality.

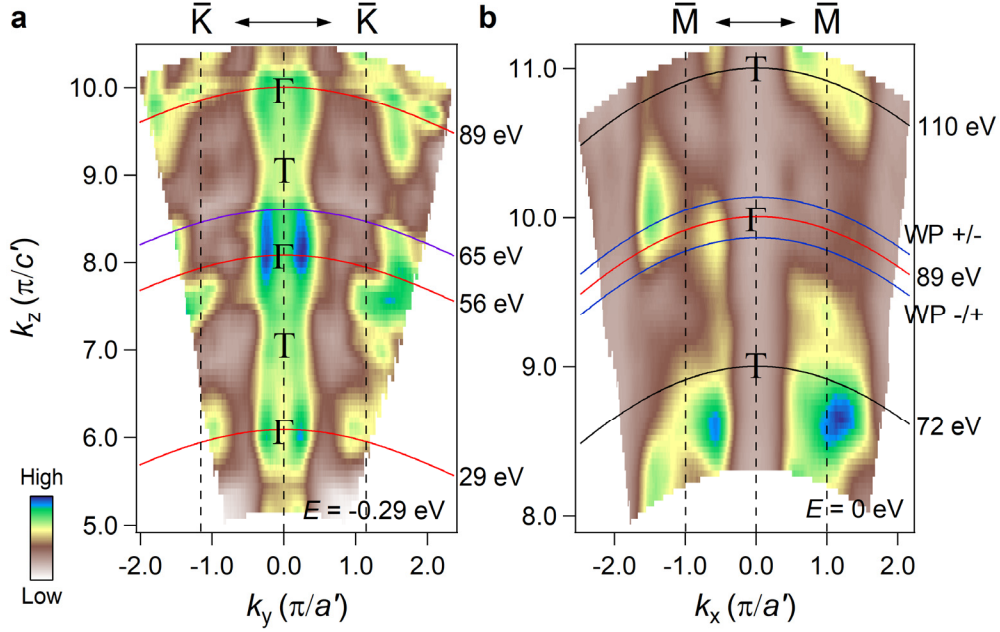

**Supplementary Figure 7.** Photon-energy-dependent study of  $\text{Co}_3\text{Sn}_2\text{S}_2$ . **(a)** ARPES intensity map at  $E = -0.29$  eV in the  $k_y - k_z$  plane at  $k_x = 0$  recorded with various photon energies, in which  $a' = \sqrt{3}a/2$  ( $a = 5.38$  Å),  $c' = c/2$  ( $c = 13.19$  Å). The inner potential ( $V_0$ ) is estimated to be 10 eV. **(b)** Same as **a** but at  $E_F$  in the  $k_x - k_z$  plane at  $k_y = 0$ . Red and black curves indicate the momentum locations of  $k_z = 0$  and  $\pi$  planes, respectively. Blue curves represent the  $k_z = \pm 0.1455 \pi$  planes, where the magnetic Weyl fermions with opposite chirality are located, respectively.

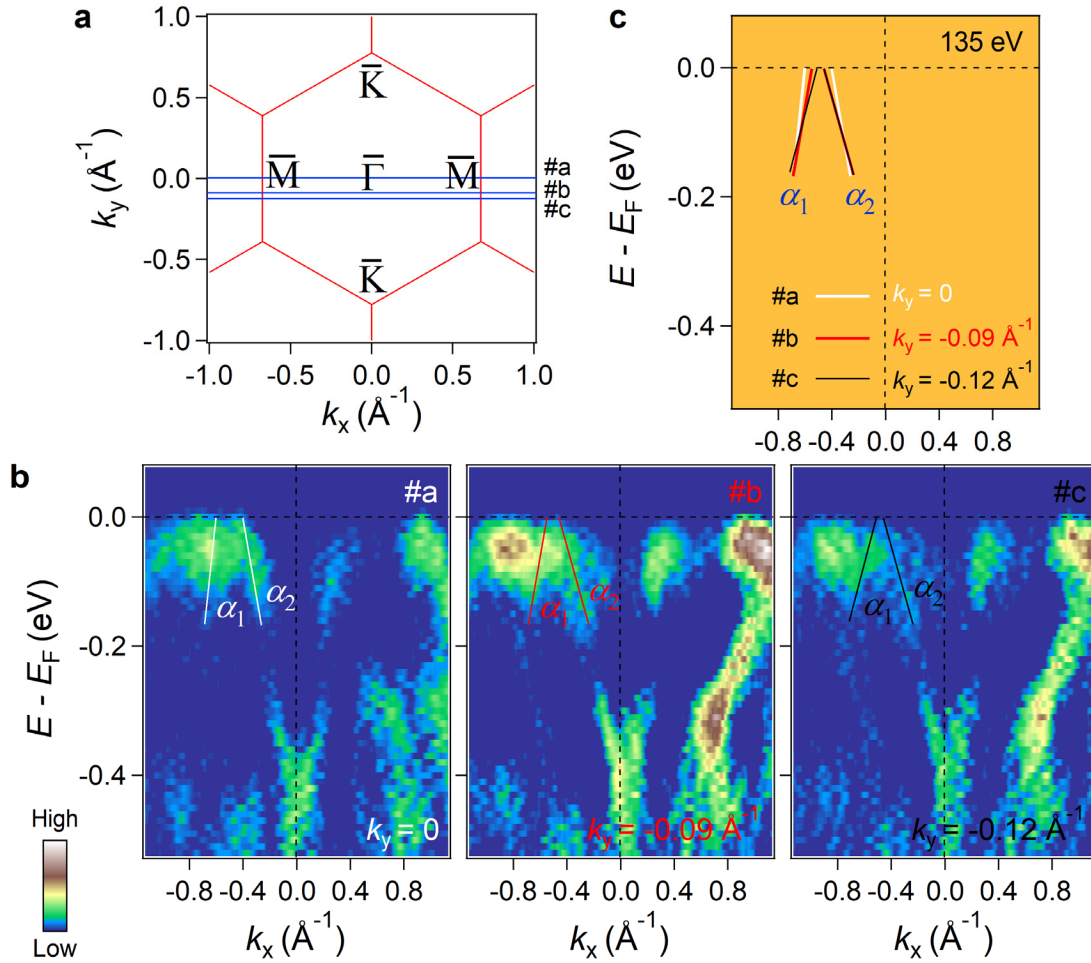

**Supplementary Figure 8.** Band structure evolution off the momentum position of Weyl point. (a) Schematic 2D BZs with marked cuts #a-#c indicating the momentum locations of the measured bands in b. (b) Second derivative intensity plots along cuts #a-#c in a, respectively, recorded at  $h\nu = 135 \text{ eV}$ . The near- $E_F$   $\alpha_1$  and  $\alpha_2$  bands forming the Weyl nodes are traced out by solid lines. (c) Draft of the  $\alpha_1$  and  $\alpha_2$  band dispersions near  $E_F$  extracted from b for different  $k_y$  positions.



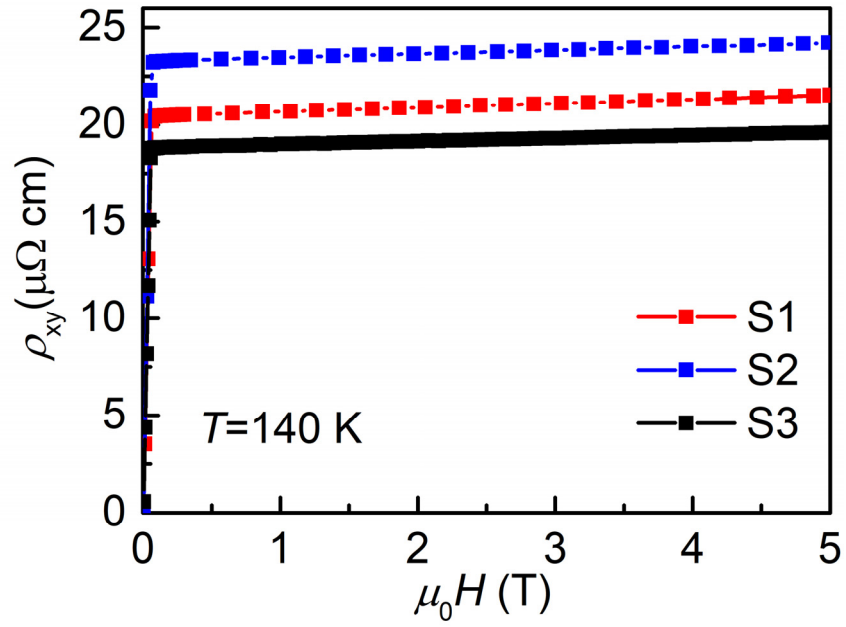

**Supplementary Figure 9.** Field dependence of Hall resistivity at 140 K for three crystals.

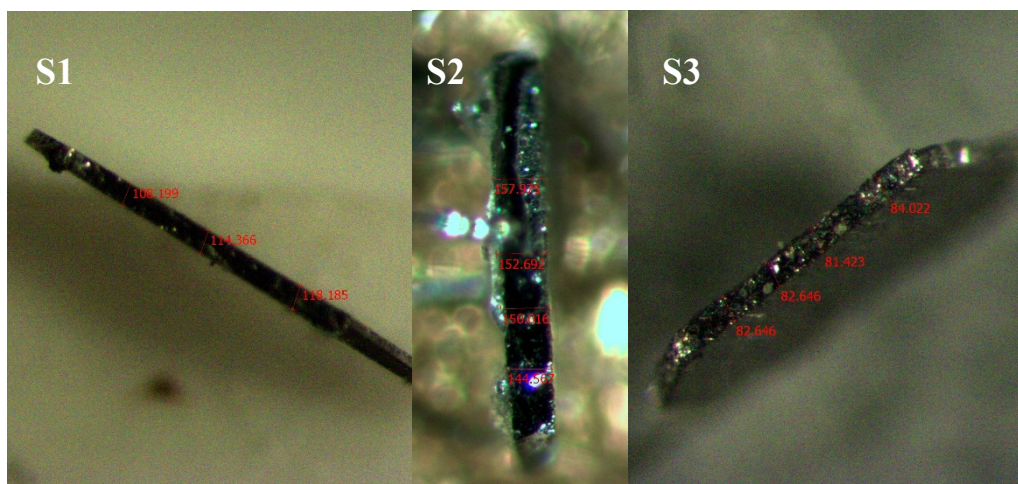

**Supplementary Figure 10.** Measurement uncertainty of sample thickness for three crystals. The unit of length is  $\mu\text{m}$ .

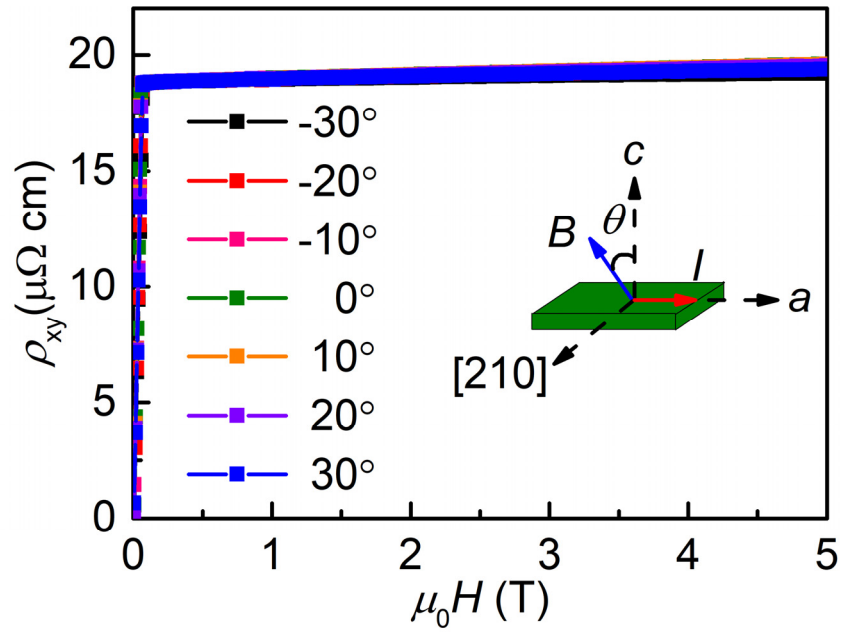

**Supplementary Figure 11.** Angular dependence of  $\rho_{xy}(\theta)$ . The  $\theta$  is the angle between magnetic field and the  $c$  axis of  $\text{Co}_3\text{Sn}_2\text{S}_2$  crystal. Magnetic field is always perpendicular to the current direction.

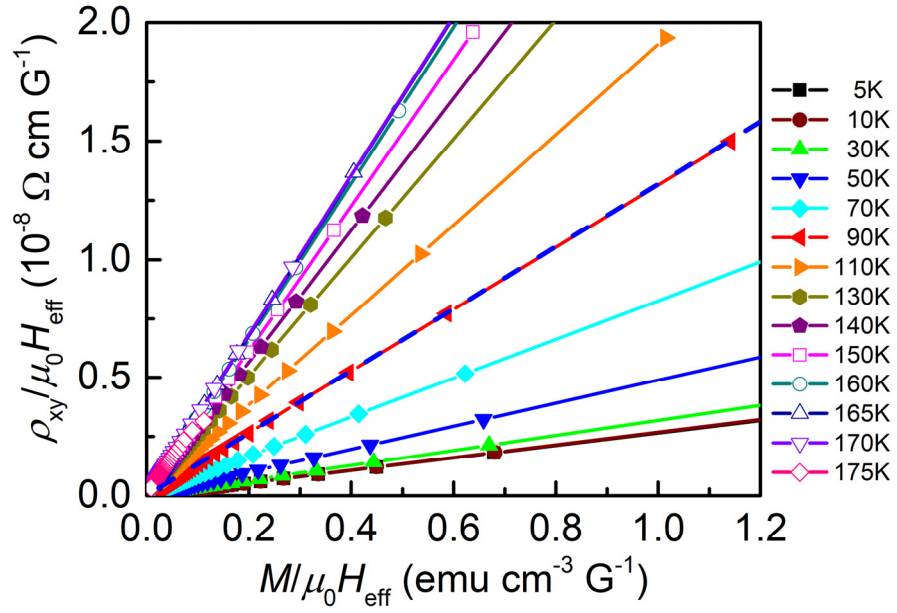

**Supplementary Figure 12.**  $\rho_{xy}/H_{\text{eff}}$  vs.  $M/H_{\text{eff}}$  at different temperatures. The blue dash line is the linear fit at 90 K.

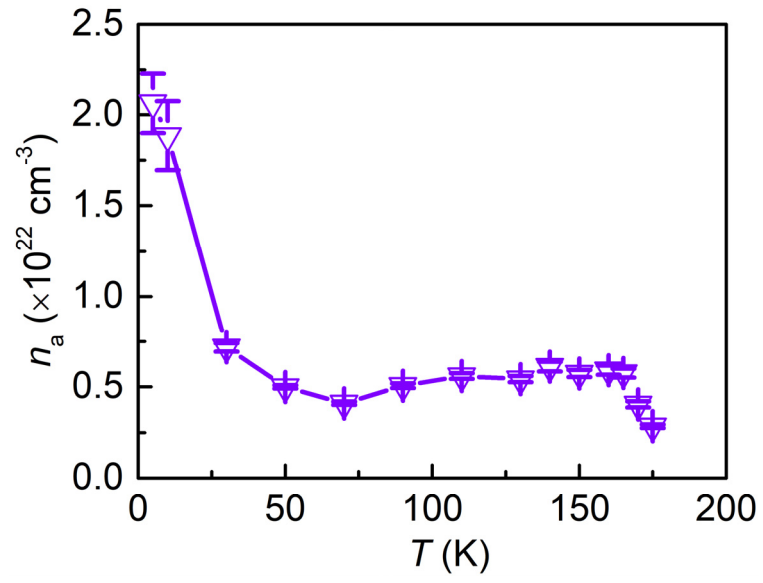

**Supplementary Figure 13.** Derived  $n_a(T)$  from  $R_0(T)$ .

## Supplementary Table

**Supplementary Table 1.** The positions and chirality of six pairs of Weyl points in the BZ.

The positions ( $k_1, k_2, k_3$ ) are in unit of the reciprocal lattices.

| No. | $k_1$     | $k_2$     | $k_3$     | Chirality |
|-----|-----------|-----------|-----------|-----------|
| 1   | -0.059795 | -0.059809 | 0.360922  | +         |
| 2   | -0.059795 | 0.360922  | -0.059809 | +         |
| 3   | 0.360922  | -0.059795 | -0.059809 | +         |
| 4   | 0.059795  | 0.059809  | -0.360922 | -         |
| 5   | 0.059795  | -0.360922 | 0.059809  | -         |
| 6   | -0.360922 | 0.059795  | 0.059809  | -         |

## Supplementary Note

**Supplementary Note 1.** For ferromagnets,  $\rho_{xy} = \rho_{xy}^O + \rho_{xy}^A = R_0B + 4\pi R_sM$ , where  $\rho_{xy}^O$  is the normal Hall resistivity due to the Lorentz force,  $\rho_{xy}^A$  is the anomalous Hall resistivity.  $R_0$  is the ordinary Hall coefficient, and  $R_s$  is the anomalous Hall coefficient. The induction field  $B = \mu_0H_{\text{eff}} + M$ , where  $\mu_0H_{\text{eff}} = \mu_0H - N_dM$  and  $N_d$  is the demagnetizing factor. The calculated value of  $N_d$  is 0.77. Substituting  $B = \mu_0H_{\text{eff}} + M$  and dividing both sides by  $\mu_0H_{\text{eff}}$ , it can obtain  $\rho_{xy} / \mu_0H_{\text{eff}} = R_0 + (R_0 + R_s)(M/\mu_0H_{\text{eff}})$ . To extract  $R_0$  and  $R_s$ , the relationships between  $\rho_{xy} / \mu_0H_{\text{eff}}$  and  $M/\mu_0H_{\text{eff}}$  at various temperatures from 5 K to 175 K are plotted (Supplementary Figure 12). The values of  $R_0$  and  $R_s$  can be determined from the linear fittings of the curves. The slope and  $y$ -axial intercept is corresponding to the  $(R_0 + R_s)$  and  $R_0$ , respectively. Because the AHE vanishes above  $T_C$ , we are unable to accurately extract the  $R_0$  and  $R_s$  by using this method at  $T > T_C$ .
